# Supplementary material for: Hierarchical encoding of natural sound mixtures in ferret auditory cortex
Source: eLife journal article supplement (doi:10.7554/elife.106628), 2025-05-19
Supplement: fig1-data1 [file elife-106628-fig1-data1-v1.pdf]

## Foregrounds

|                               |                            |                            |
|-------------------------------|----------------------------|----------------------------|
| Ferret (multiple) pup calls 1 | Ferret (single) pup call 1 | Birds singing              |
| Ferret (multiple) pup calls 2 | Chicken                    | Ferret (single) pup call 2 |
| Ferret fight calls            | Baby babble                | Dog barking                |
| Dormouse vocalization         | Ferret dooking             | Ferret fear vocalization   |
| Orchestra music               | Reggae music               | Door opening and closing   |
| Biting and chewing            | Finger tapping             | Chick vocalization         |
| Spanish speech                | English speech             | Squeaky toy                |
| Italian speech                | Piano                      | Baby crying                |
| German speech                 | Saxophone                  | Walking on leaves          |
| Cello                         | Walking with heels         | R&B music                  |
| Chimes in the wind            | French speech              | Violin                     |
| Chopping food                 | Russian speech             | Hindi speech               |

## Backgrounds

|                      |                       |                    |
|----------------------|-----------------------|--------------------|
| Applause - big room  | Blender               | Air conditioner 1  |
| Crunching cellophane | Castanets             | Air conditioner 2  |
| Fire                 | Drumroll              | Construction site  |
| Frogs 1              | Heavy rain on surface | Fire alarm bell    |
| Frying eggs          | Jungle rain           | Frogs 2            |
| Helicopter 1         | Pneumatic drills      | Helicopter 2       |
| Metal lathe          | Rain                  | Jackhammer         |
| Radio static         | Rain in woods         | Printing press     |
| Rattlesnake rattle   | Sander                | Rhythmic applause  |
| Scratching beard     | Small river           | Tambourine shaking |
| Teletype             | Stream                | Windshield wipers  |
| Waterfall            | Wind blowing          | Motor engine       |
